# Supplementary material
Source: PubMed Central journal article supplement (PMC5994353)
Supplement: NIHMS930466-supplement-1.pdf [file NIHMS930466-supplement-1.pdf]

**Table S1.** Statistics on the confidence and quality of models included in eRepo-ORP. Columns labeled “All data” report mean values  $\pm$ standard deviation and the number of cases for all DrugBank and Orphanet structures as well as PDB→DrugBank and DrugBank→Orphanet alignments, whereas “Pocket matches” correspond to those pairs of DrugBank and Orphanet proteins producing statistically significant pocket alignments.

| Dataset                        | Score <sup>e</sup> | All data        |            | Pocket matches  |            |
|--------------------------------|--------------------|-----------------|------------|-----------------|------------|
|                                |                    | mean $\pm$ std. | # of cases | mean $\pm$ std. | # of cases |
| DrugBank <sup>a</sup>          | GDT-score          | 0.71 $\pm$ 0.17 | 348        | 0.75 $\pm$ 0.15 | 282        |
|                                | Pocket conf.       | 0.87 $\pm$ 0.18 |            | 0.87 $\pm$ 0.19 |            |
| Orphanet <sup>b</sup>          | GDT-score          | 0.68 $\pm$ 0.15 | 922        | 0.69 $\pm$ 0.14 | 761        |
|                                | Pocket conf.       | 0.82 $\pm$ 0.22 |            | 0.82 $\pm$ 0.22 |            |
| PDB→DrugBank <sup>c</sup>      | TM-score           | 0.65 $\pm$ 0.14 | 2,012      | 0.68 $\pm$ 0.18 | 744        |
|                                | TC                 | 0.49 $\pm$ 0.27 |            | 0.65 $\pm$ 0.30 |            |
| DrugBank→Orphanet <sup>d</sup> | TM-score           | 0.26 $\pm$ 0.08 | 320,714    | 0.27 $\pm$ 0.10 | 18,145     |
|                                | eMS-score          | 0.13 $\pm$ 0.20 |            | 0.91 $\pm$ 0.11 |            |

<sup>a</sup> Structure models generated for DrugBank proteins by eThread with binding sites predicted by eFindSite. <sup>b</sup> Structure models generated for Orphanet proteins by eThread with binding sites predicted by eFindSite. <sup>c</sup> Alignment between DrugBank structures and holo-templates selected from the PDB to position drugs within binding sites. <sup>d</sup> Pairs of DrugBank and Orphanet proteins. <sup>e</sup> GDT-score is estimated by ModelEvaluator, pocket confidence is estimated by eFindSite for the top-ranked drug-binding sites, TM-score measures the global structure similarity, TC is the Tanimoto coefficient reported by kcombu, eMS-score is the pocket similarity reported by eMatchSite.
